# Supplementary material for: Identification and Expression Analysis of Putative Sugar Transporter Gene Family during Bulb Formation in Lilies
Source: MDPI journal article supplement (doi:10.3390/ijms25063483), 2024-03-20
Supplement: s1 [file s1]

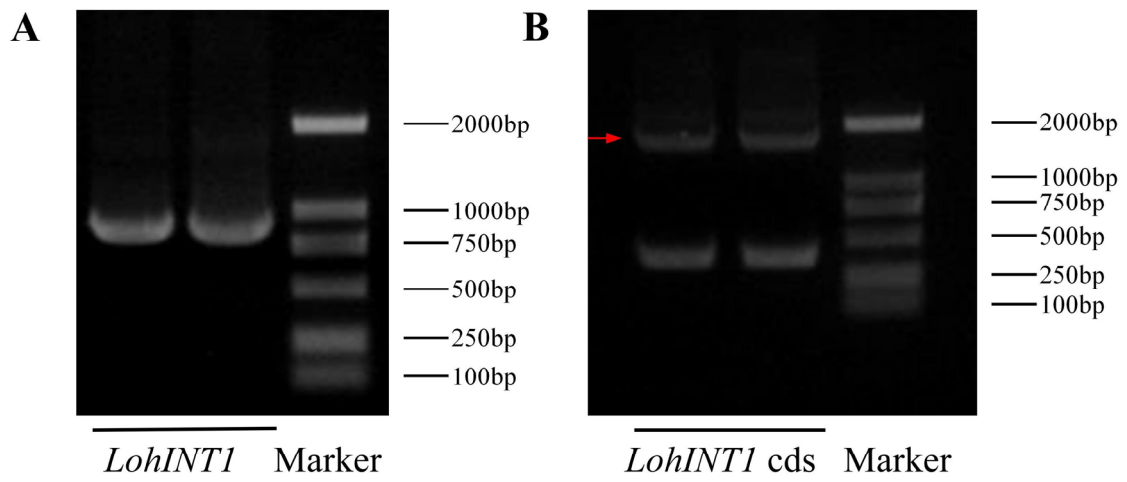

Figure S1: Results of 1% agarose gel electrophoresis analysis. (A) Agarose gel electrophoresis of *LohINT1* gene from transcript DNA. (B) Agarose gel electrophoresis of full-length *LohINT1* gene. The red arrow indicates the target band
